# Supplementary material for: Design, Synthesis, Molecular Modeling and Antitumor Evaluation of Novel Indolyl-Pyrimidine Derivatives with EGFR Inhibitory Activity
Source: PubMed Central journal article supplement (PMC8037142; doi:10.3390/molecules26071838), 2021-03-25

## **Supplementary material**

### **Design, Synthesis, Molecular Modeling and Antitumor Evaluation of Novel Indolyl-Pyrimidine Derivatives with EGFR Inhibitory Activity**

Naglaa Mohamed Ahmed <sup>a</sup>, Mahmoud Moustafa Youns <sup>b,c</sup>, Moustafa khames Soltan <sup>d,c</sup>, Ahmed  
Mohammed Said\*<sup>a,e</sup>

<sup>a</sup> Pharmaceutical Organic Chemistry Department, Faculty of Pharmacy, Helwan University, Ein-Helwan, Helwan, Cairo 11795, Egypt

<sup>b</sup> Biochemistry Department, Faculty of Pharmacy, Helwan University, Ein Helwan, Helwan, Cairo 11795, Egypt

<sup>c</sup> Oman college of Health sciences, Muscat, Sultanate of Oman

<sup>d</sup> Medicinal Chemistry Department, Faculty of Pharmacy, Zagazig University, Egypt

<sup>e</sup> Department of Chemistry, University at Buffalo, The State University of New York, Buffalo, NY 14260, USA

\*To whom correspondence should be addressed:

Department of Pharmaceutical Organic Chemistry, Faculty of Pharmacy, Helwan University,

Cairo, Egypt E-mail: [ahmedchem1982@gmail.com](mailto:ahmedchem1982@gmail.com) or [ahmedmoh@buffalo.edu](mailto:ahmedmoh@buffalo.edu)

## 1. Docking experiments:

| mode | affinity<br>(kcal/mol) | dist from best mode |           |
|------|------------------------|---------------------|-----------|
|      |                        | rmsd l.b.           | rmsd u.b. |
| 1    | -7.3                   | 0.000               | 0.000     |
| 2    | -7.3                   | 2.189               | 4.229     |
| 3    | -7.3                   | 2.593               | 4.556     |
| 4    | -7.1                   | 3.565               | 6.032     |
| 5    | -7.0                   | 1.332               | 2.270     |
| 6    | -6.9                   | 2.775               | 5.885     |
| 7    | -6.9                   | 2.582               | 6.498     |
| 8    | -6.8                   | 2.357               | 4.425     |
| 9    | -6.8                   | 3.953               | 8.950     |

Figure S1. Docking results of erlotinib inside the EGFR binding site

| mode | affinity<br>(kcal/mol) | dist from best mode |           |
|------|------------------------|---------------------|-----------|
|      |                        | rmsd l.b.           | rmsd u.b. |
| 1    | -9.6                   | 0.000               | 0.000     |
| 2    | -9.2                   | 0.997               | 1.491     |
| 3    | -9.2                   | 1.712               | 4.462     |
| 4    | -9.1                   | 3.374               | 6.715     |
| 5    | -9.1                   | 2.222               | 4.306     |
| 6    | -8.9                   | 3.261               | 7.479     |
| 7    | -8.8                   | 2.381               | 3.282     |
| 8    | -8.8                   | 4.164               | 6.640     |
| 9    | -8.8                   | 3.553               | 7.003     |

Figure S2. Docking results of compound 4g inside the EGFR binding site

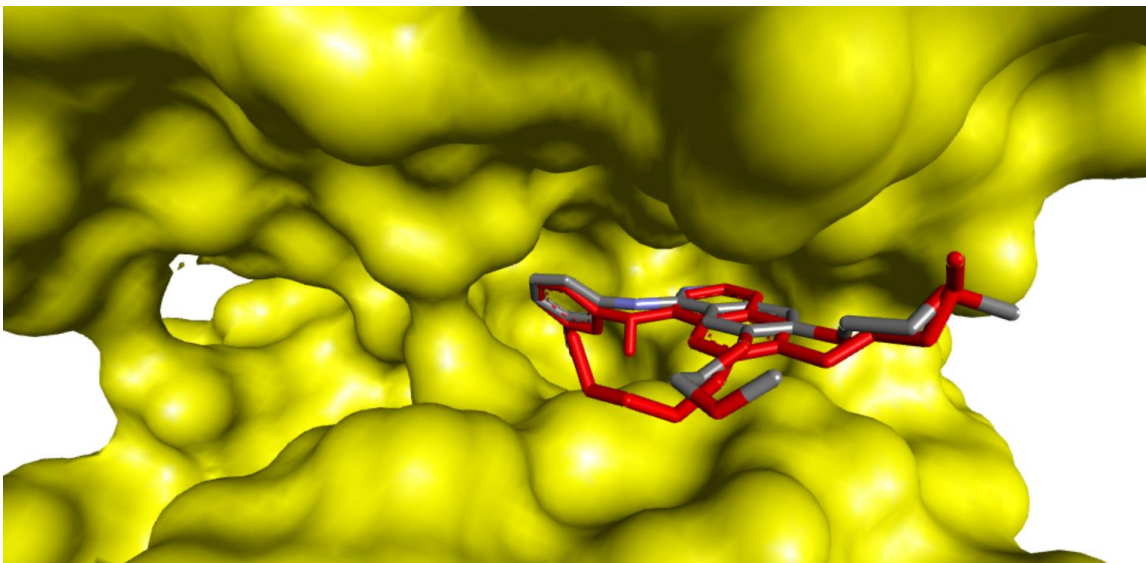

**Figure S3.** Overlapping the docked structure of erlotinib (red) and the x-ray crystal structure of erlotinib (grey) inside the EGFR binding site

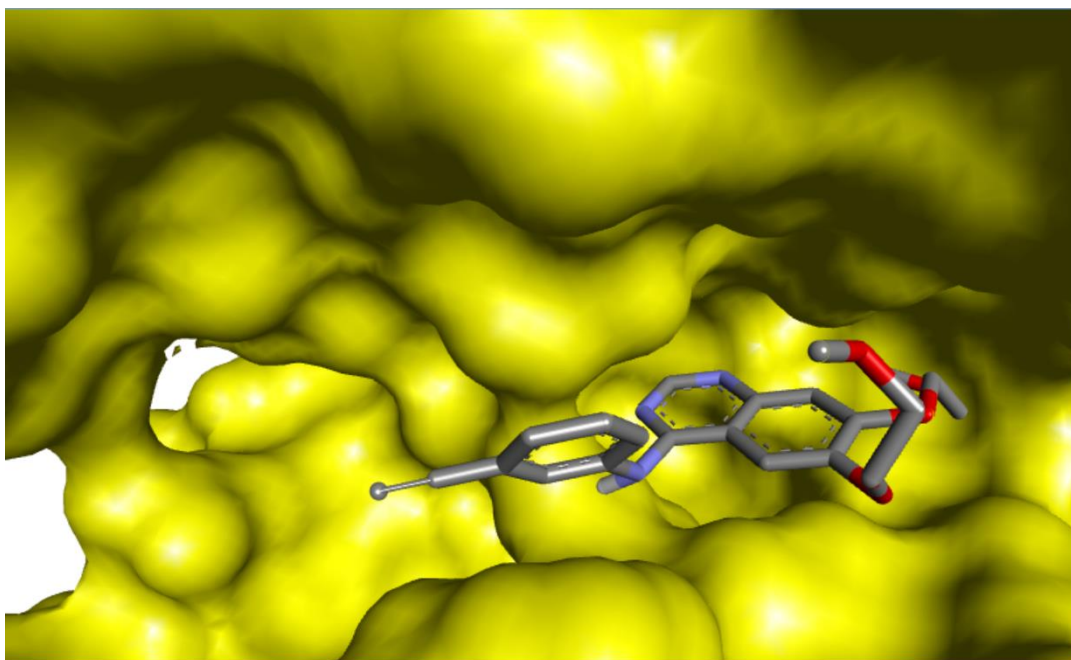

**Figure S4.** Docked erlotinib inside the EGFR binding site

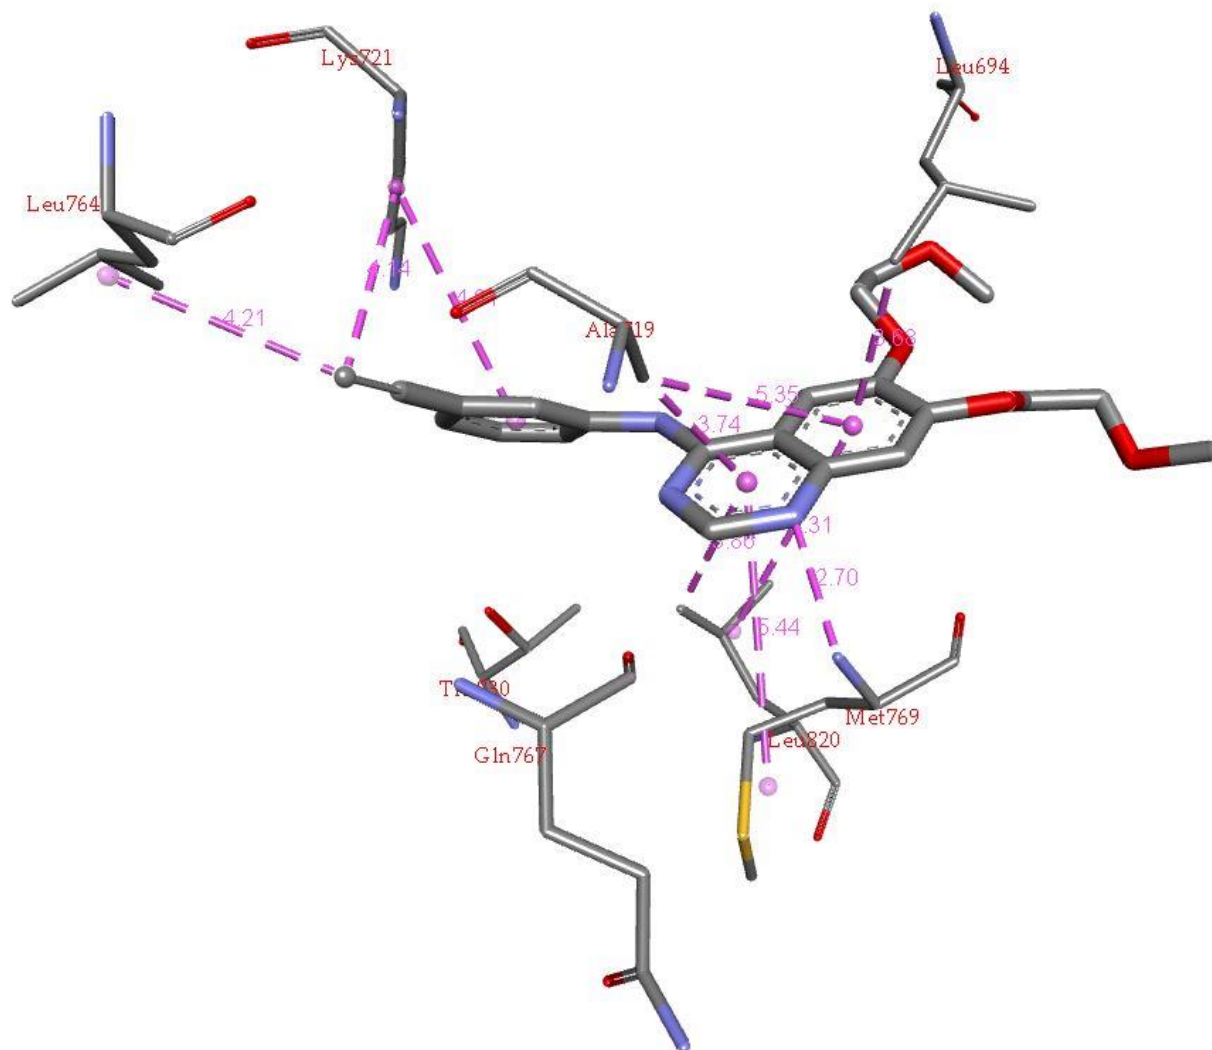

**Figure S5.** Non-covalent interactions of docked erlotinib inside the EGFR binding site

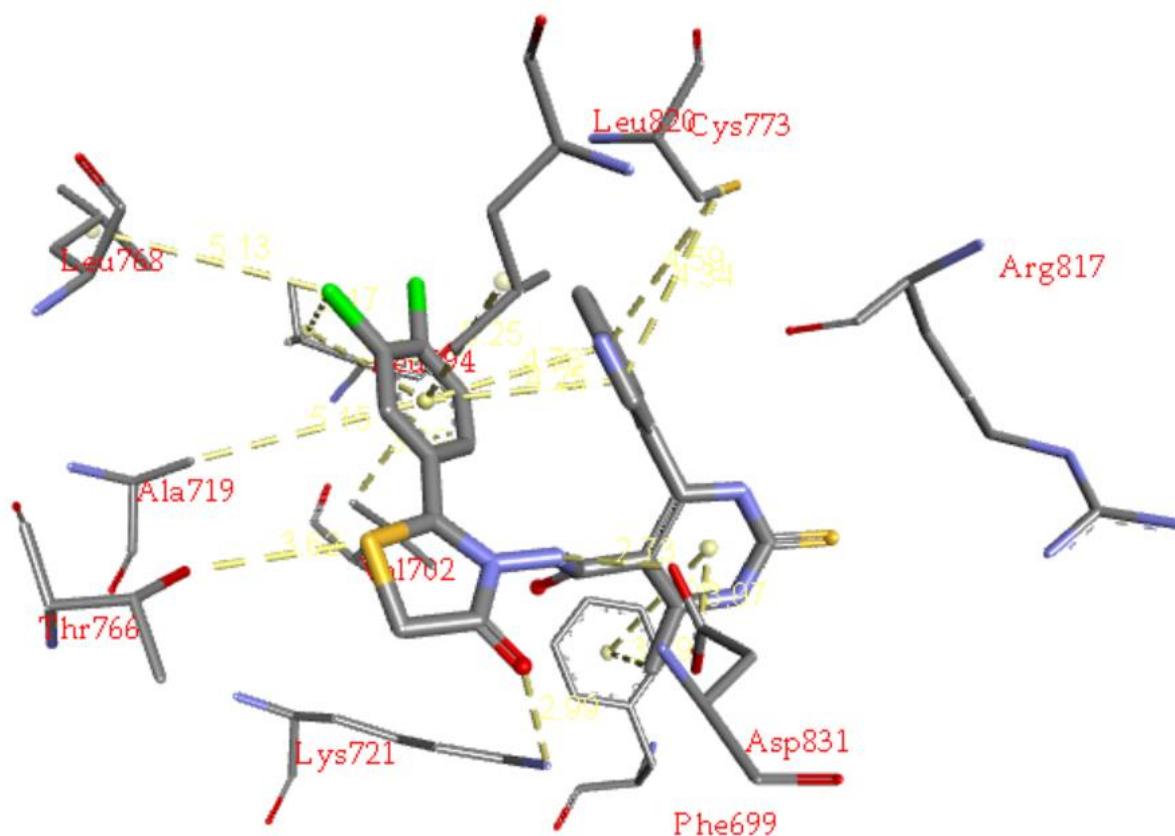

**Figure S6.** Non-covalent interactions of docked compound **4g** inside the EGFR binding site

## **2. Biological Evaluation Details:**

**a) *In vivo* antitumor assay: Materials.** Adult Swiss male mice (weighing 20-25 g) were obtained from the Department of Pharmacology, Faculty of Pharmacy, Mansoura University, Egypt. They were kept in microlon boxes at temperature  $25 \pm 2$  °C with a regular 12 hrs light/dark cycle. In addition, food and water were available. EAC cells (procured from NCI, Cairo, Egypt) were harvested and prepared, then their total number was counted.

*Procedure.* 7 Groups of mice ( $n = 4$ ) were used.

Group 1: Negative control (no EAC cells) - received normal saline.

Group 2: Positive control (EAC cells) - received normal saline.

Group 3: EAC cells - treated with compound **3g** (0.5 mg/mouse).

Group 4: EAC cells - treated with compound **4f** (0.5 mg/mouse).

Group 5: EAC cells - treated with compound **4g** (0.5 mg/mouse).

Group 6: EAC cells - treated with compound **4h** (0.5 mg/mouse).

Group 7: EAC cells - treated with 5-fluorouracil (0.5 mg/mouse).  
2 x 10<sup>6</sup> EAC cells were injected intraperitoneally in each mouse (groups 2-7). After one day, compounds **3g**, **4f**, **4g** and **4h**, and 5-fluorouracil were administered to mice for nine days, then blood samples were withdrawn for assessment of blood count.

*Determination of tumor volume*

The ascetic fluid was gathered from the peritoneal cavity and its volume was determined. It was then centrifuged, and the packed tumor cell volume was measured.

*Determination of viable tumor cell count*

100  $\mu$ L Sample of EAC cells (from three mice per group) was utilized and diluted twenty times with saline. Cells were stained with trypan blue, viable cells are not stained, while the dead ones are stained. The number of viable cells was calculated.

**3. Chemistry Details: Representative Spectra.**

DMSO-d<sub>6</sub>

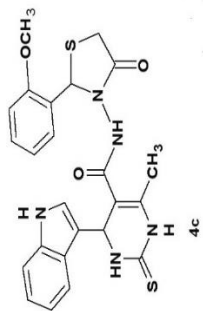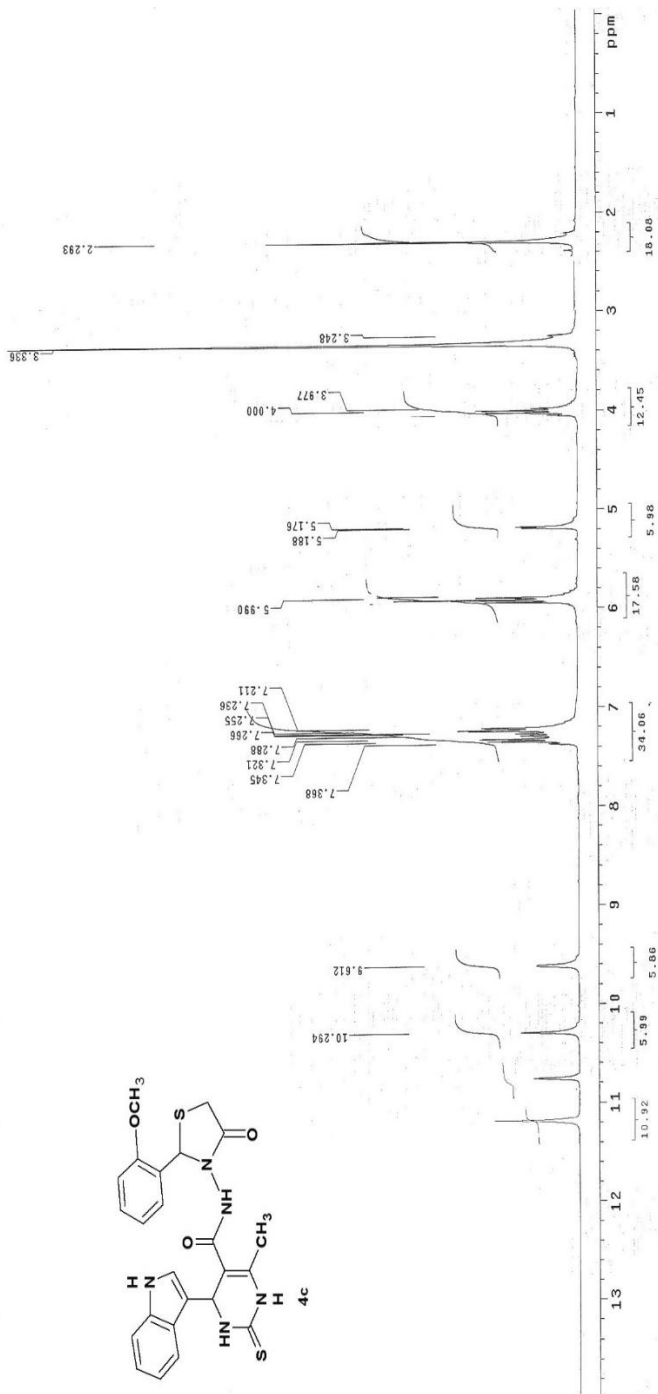

-DMSO-H1

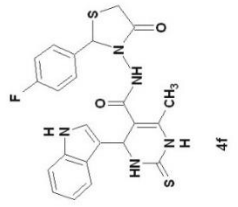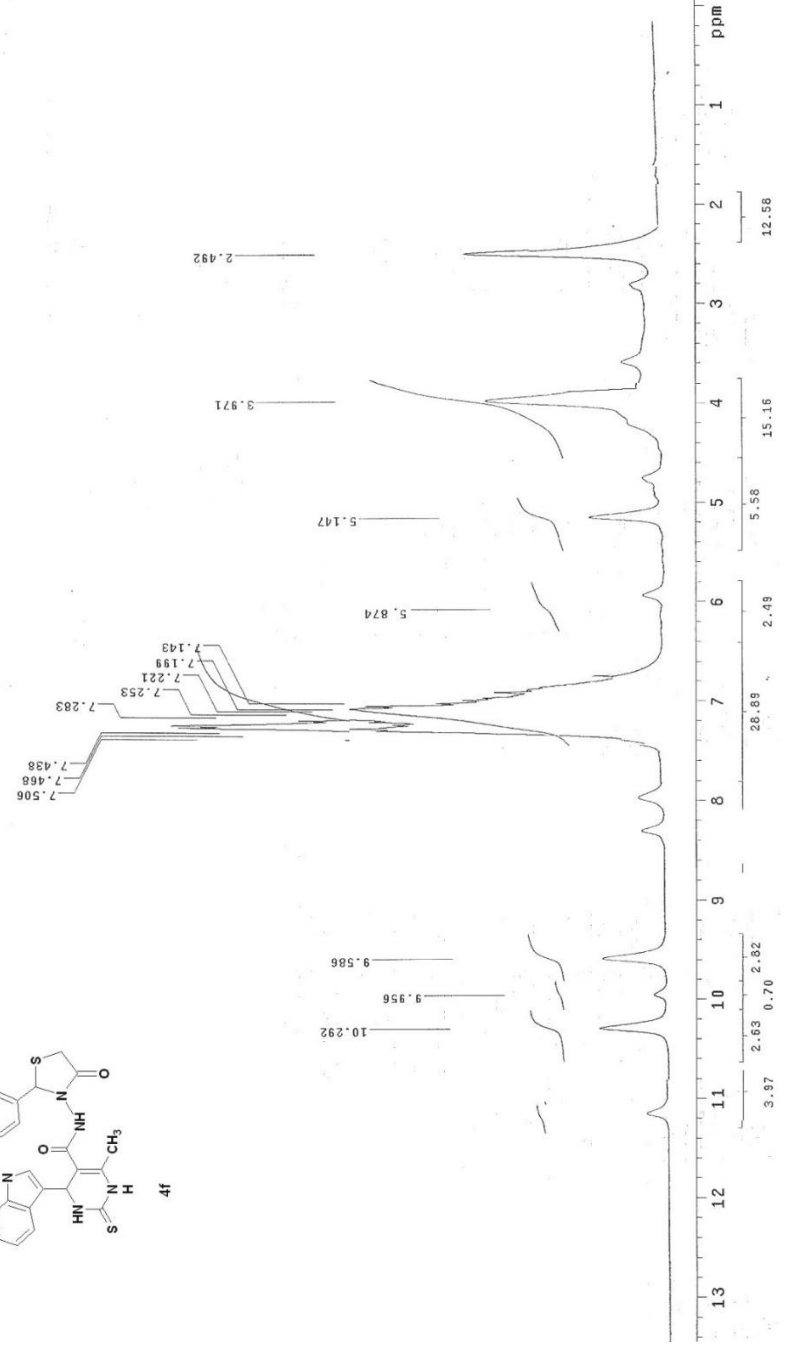



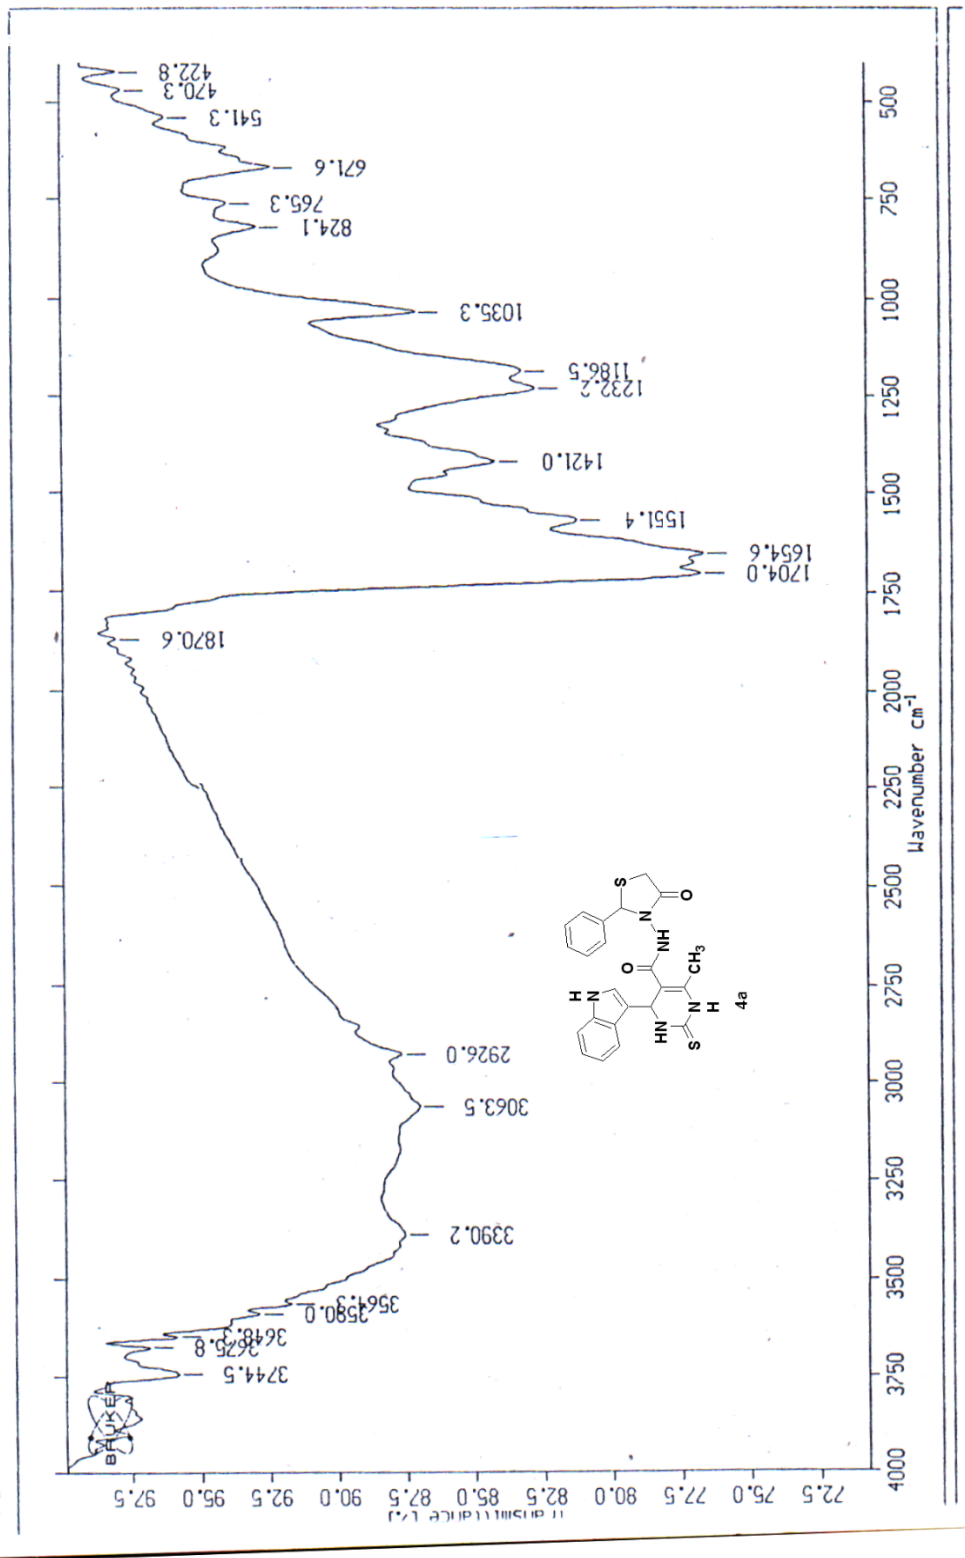

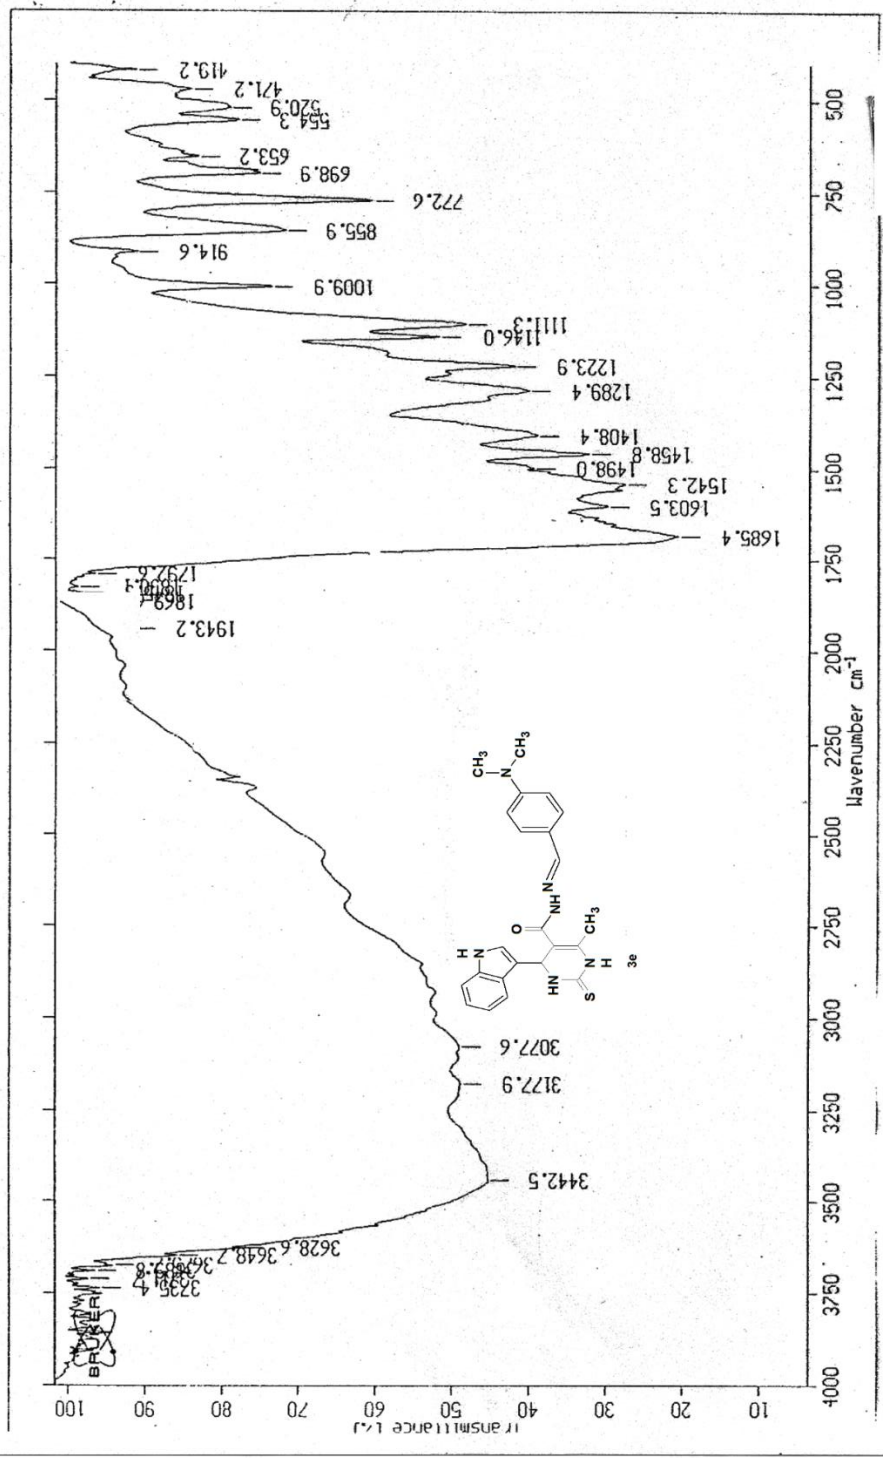

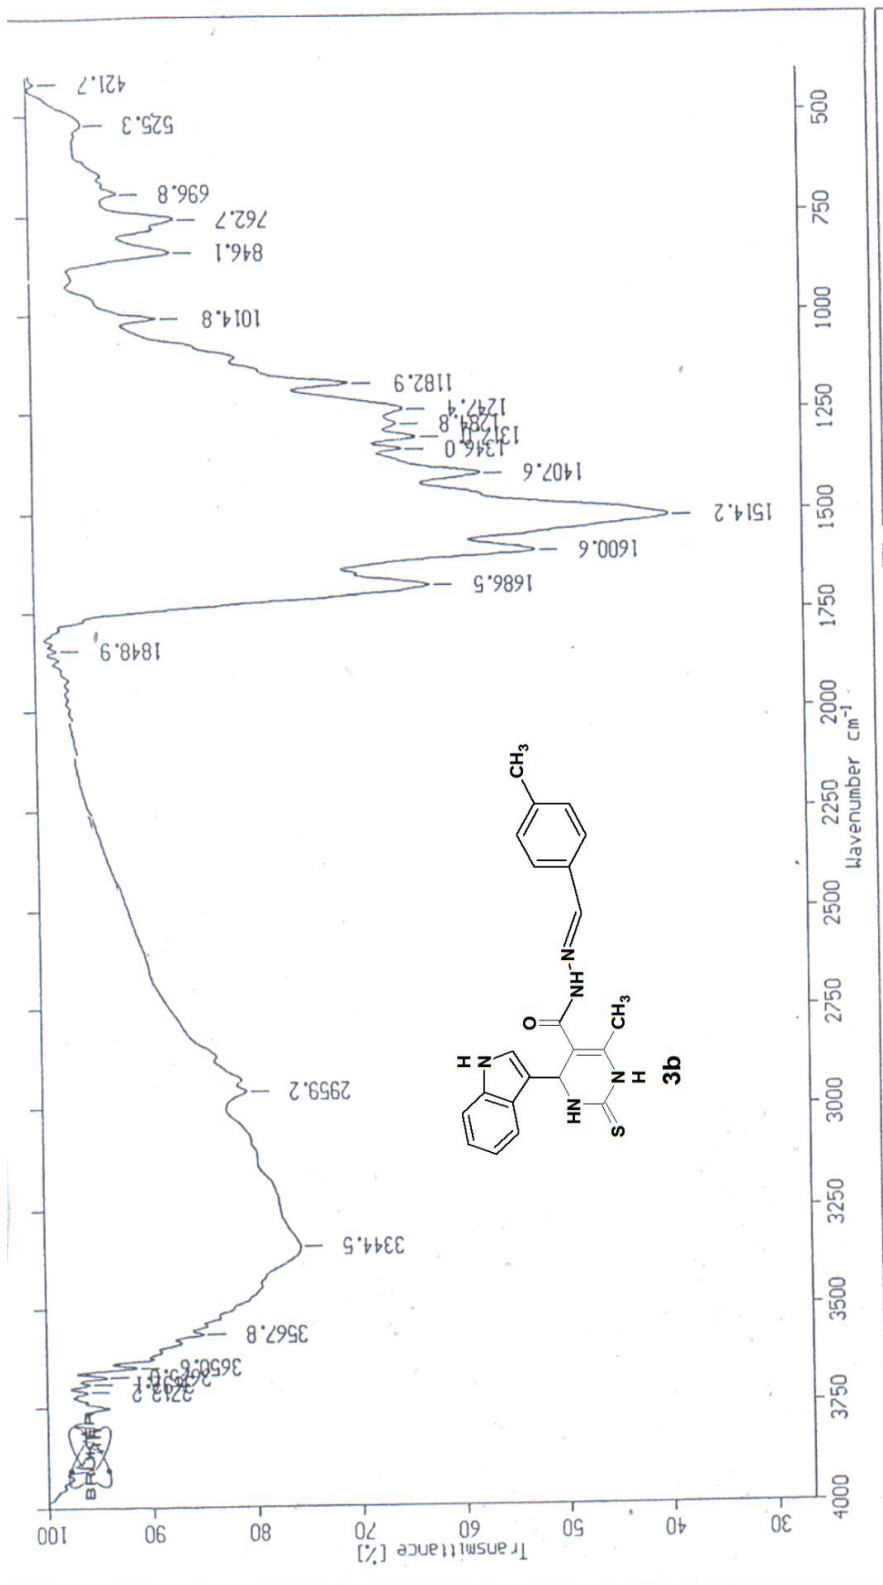

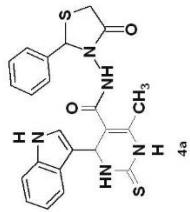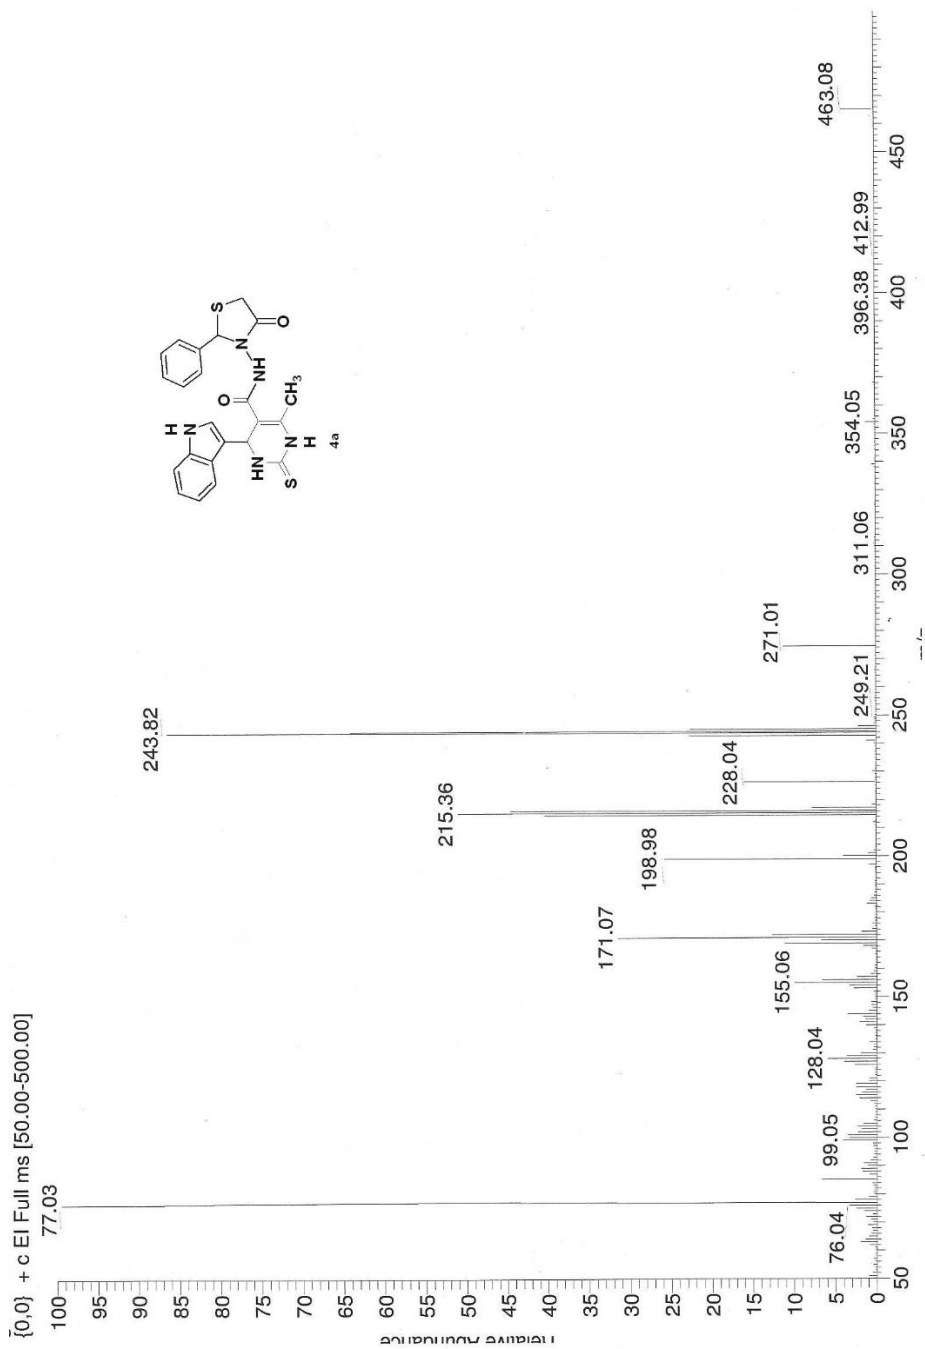

{0,0} + c EI Full ms [50.00-500.00]

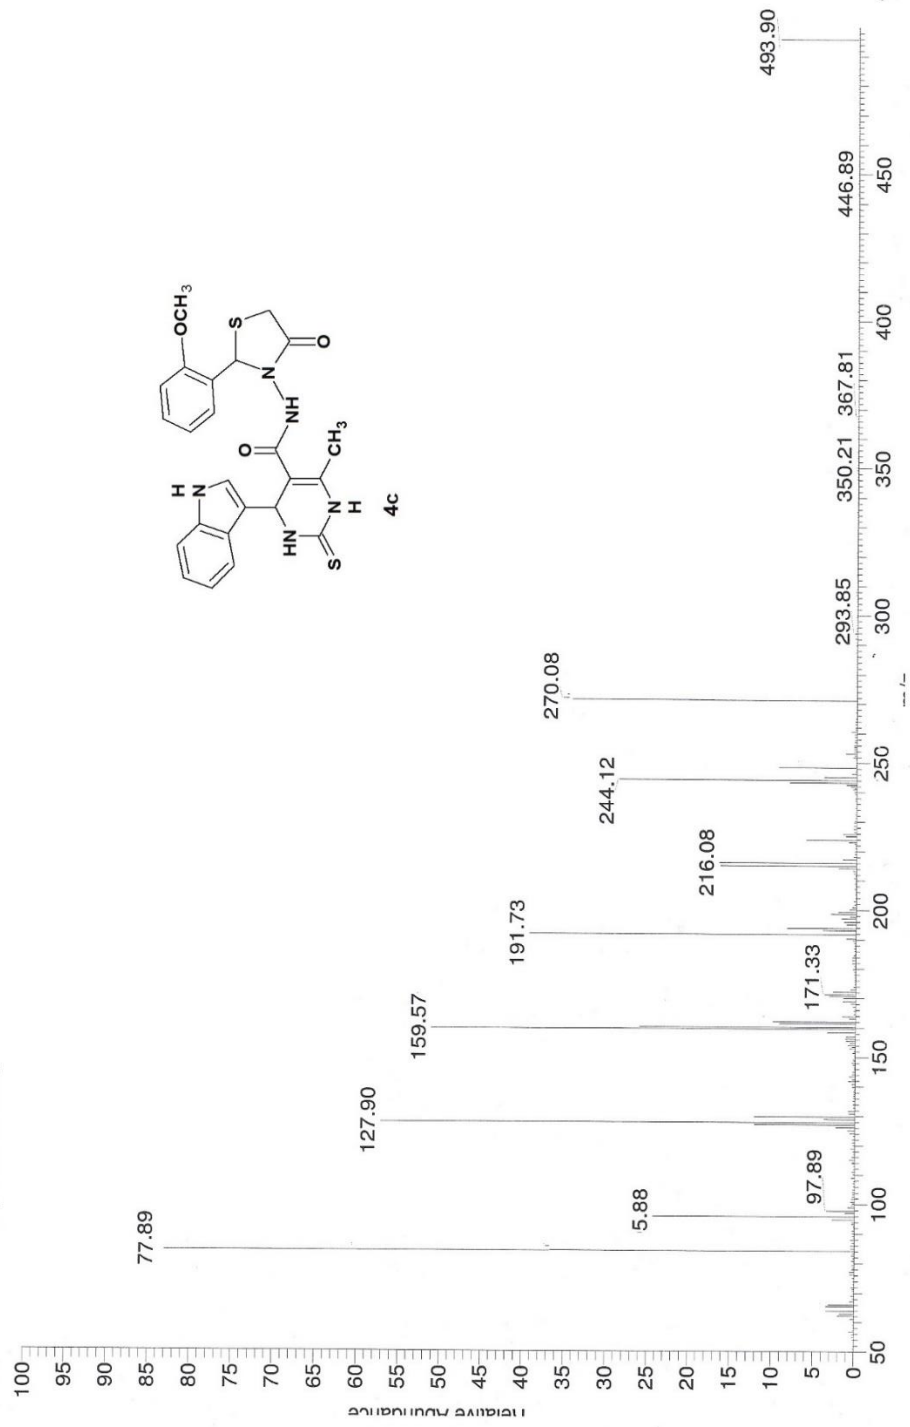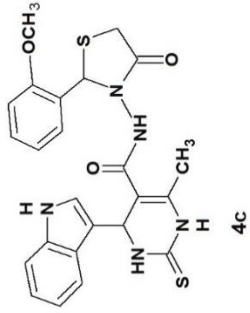

{0.0} + c EI Full ms [50.00-500.00]

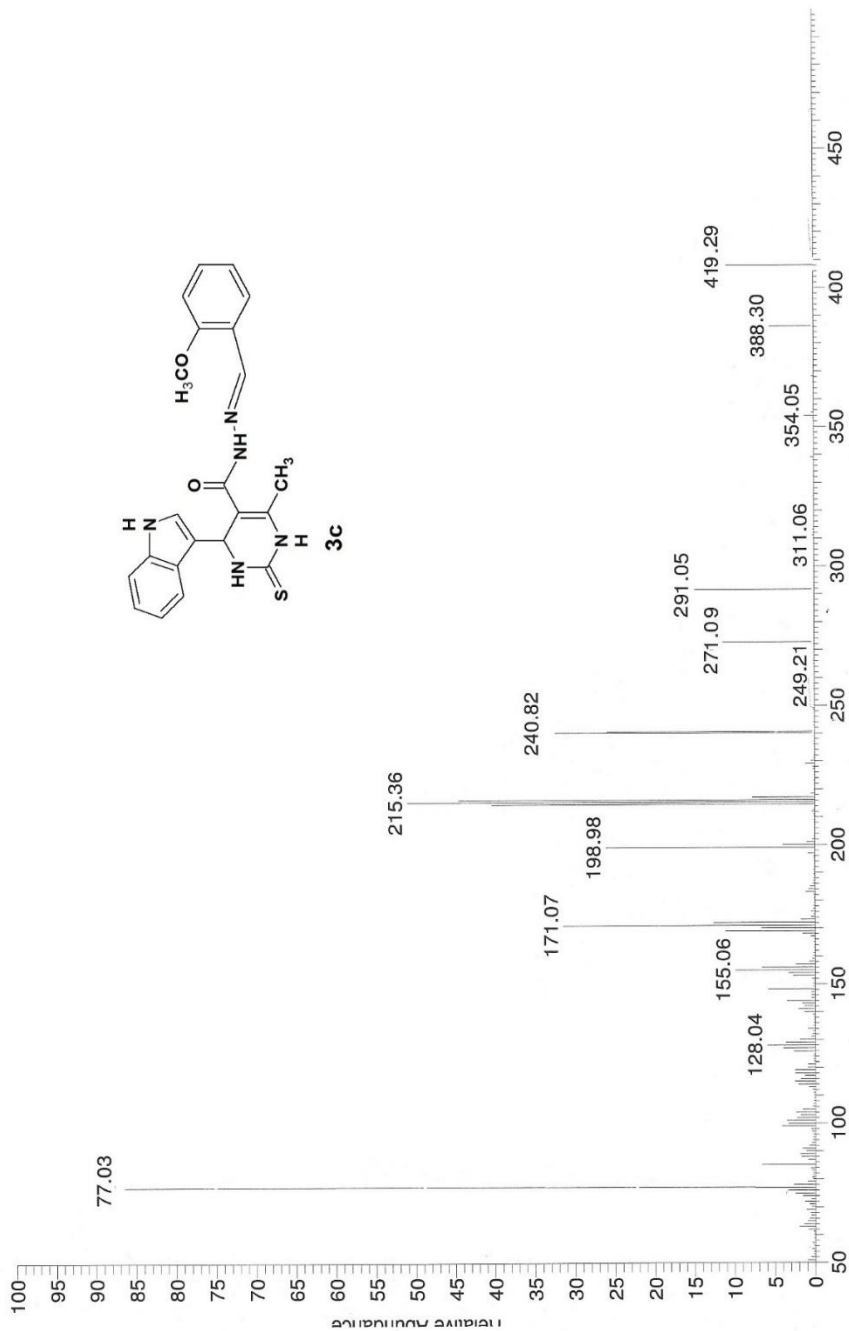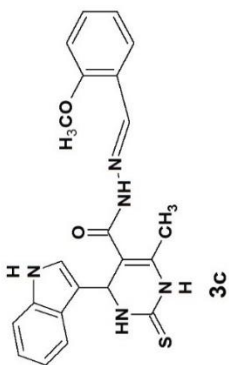

Supplement: molecules-26-01838-s001.pdf [file molecules-26-01838-s001.pdf]
